# Supplementary material
Source: PubMed Central journal article supplement (PMC7246152)
Supplement: NIHMS1545613-supplement-2.pdf [file NIHMS1545613-supplement-2.pdf]

Supplemental Table 1. All Factors Examined for Prediction of Remission of Chronic Anterior Uveitis (Hazard Ratios Less than 1 are Unfavorable, Indicating a Lower Incidence of Remission).†

|                                           |                      | Remission  |            |           | Crude                    |        | Adjusted*                |       |
|-------------------------------------------|----------------------|------------|------------|-----------|--------------------------|--------|--------------------------|-------|
|                                           |                      | Total      | No         | Yes       | Hazard Ratio<br>(95% CI) | p      | Hazard Ratio<br>(95% CI) | p     |
| Age at presentation                       | <40                  | 1384 (50%) | 1106 (80%) | 278 (20%) | Ref                      | <0.001 | Ref                      | 0.03  |
|                                           | 40+                  | 1411 (50%) | 1027 (73%) | 384 (27%) | 1.77 (1.46, 2.16)        |        | 1.29 (1.02, 1.63)        |       |
| Sex                                       | Male                 | 967 (35%)  | 730 (75%)  | 237 (25%) | Ref                      | 0.96   | Ref                      | 0.42  |
|                                           | Female               | 1828 (65%) | 1403 (77%) | 425 (23%) | 1.00 (0.82, 1.23)        |        | 1.09 (0.88, 1.36)        |       |
| Race category                             | White                | 1682 (60%) | 1250 (74%) | 432 (26%) | Ref                      | 0.82   | Ref                      | 0.81  |
|                                           | Black                | 449 (16%)  | 355 (79%)  | 94 (21%)  | 0.90 (0.67, 1.19)        |        | 0.89 (0.66, 1.19)        |       |
|                                           | Hispanic             | 120 (4%)   | 96 (80%)   | 24 (20%)  | 0.85 (0.50, 1.42)        |        | 1.15 (0.67, 1.98)        |       |
|                                           | Other                | 544 (19%)  | 432 (79%)  | 112 (21%) | 0.95 (0.72, 1.24)        |        | 0.98 (0.74, 1.31)        |       |
| Smoking                                   | Never                | 1999 (72%) | 1543 (77%) | 456 (23%) | Ref                      | 0.08   | Ref                      | 0.47  |
|                                           | Past                 | 309 (11%)  | 217 (70%)  | 92 (30%)  | 1.47 (1.10, 1.97)        |        | 1.08 (0.78, 1.50)        |       |
|                                           | Current              | 313 (11%)  | 241 (77%)  | 72 (23%)  | 1.08 (0.80, 1.47)        |        | 0.81 (0.58, 1.14)        |       |
|                                           | Unknown              | 174 (6%)   | 132 (76%)  | 42 (24%)  | 1.08 (0.72, 1.61)        |        | 0.82 (0.51, 1.31)        |       |
| Bilateral                                 | No                   | 379 (14%)  | 283 (75%)  | 96 (25%)  | Ref                      | 0.008  | Ref                      | 0.02  |
|                                           | Yes                  | 2416 (86%) | 1850 (77%) | 566 (23%) | 0.73 (0.58, 0.92)        |        | 0.75 (0.59, 0.96)        |       |
| Duration of uveitis prior to presentation | <6 Months            | 834 (30%)  | 593 (71%)  | 241 (29%) | Ref                      | <0.001 | Ref                      | 0.02  |
|                                           | 6 Months to <2 Years | 620 (22%)  | 464 (75%)  | 156 (25%) | 0.81 (0.63, 1.05)        |        | 0.78 (0.60, 1.03)        |       |
|                                           | 2 to <5 Years        | 512 (18%)  | 414 (81%)  | 98 (19%)  | 0.58 (0.43, 0.78)        |        | 0.61 (0.44, 0.83)        |       |
|                                           | 5+ Years             | 829 (30%)  | 662 (80%)  | 167 (20%) | 0.63 (0.48, 0.81)        |        | 0.76 (0.58, 1.01)        |       |
| Prior cataract surgery                    | No                   | 2231 (80%) | 1698 (76%) | 533 (24%) | Ref                      | 0.03   | Ref                      | 0.002 |
|                                           | Yes                  | 564 (20%)  | 435 (77%)  | 129 (23%) | 0.80 (0.65, 0.97)        |        | 0.70 (0.56, 0.88)        |       |

|                                                          |                 | Remission  |            |           | Crude                    |        | Adjusted*                |        |
|----------------------------------------------------------|-----------------|------------|------------|-----------|--------------------------|--------|--------------------------|--------|
|                                                          |                 | Total      | No         | Yes       | Hazard Ratio<br>(95% CI) | p      | Hazard Ratio<br>(95% CI) | p      |
| Pars Plana Vitrectomy<br>(not for Retinal<br>Detachment) | No              | 2721 (97%) | 2068 (76%) | 653 (24%) | Ref                      | 0.004  | Ref                      | 0.16   |
|                                                          | Yes             | 74 (3%)    | 65 (88%)   | 9 (12%)   | 0.52 (0.34, 0.82)        |        | 0.72 (0.45, 1.15)        |        |
| Any glaucoma<br>surgery                                  | No              | 2627 (94%) | 1995 (76%) | 632 (24%) | Ref                      | 0.001  | Ref                      | 0.01   |
|                                                          | Yes             | 168 (6%)   | 138 (82%)  | 30 (18%)  | 0.59 (0.43, 0.81)        |        | 0.63 (0.45, 0.90)        |        |
| Inflammatory<br>activity at baseline                     | Inactive        | 1138 (43%) | 869 (76%)  | 269 (24%) | Ref                      | 0.09   | Ref                      | 0.98   |
|                                                          | Slightly active | 381 (14%)  | 274 (72%)  | 107 (28%) | 1.22 (0.92, 1.61)        |        | 0.96 (0.68, 1.38)        |        |
|                                                          | Active          | 1156 (43%) | 907 (78%)  | 249 (22%) | 0.89 (0.73, 1.10)        |        | 0.99 (0.72, 1.37)        |        |
| Anterior chamber<br>cells at baseline                    | Quiet           | 1153 (43%) | 884 (77%)  | 269 (23%) | Ref                      | <0.001 | Ref                      | <0.001 |
|                                                          | 0.5+            | 530 (20%)  | 369 (70%)  | 161 (30%) | 1.46 (1.17, 1.83)        |        | 1.48 (1.17, 1.87)        |        |
|                                                          | 1+              | 472 (18%)  | 377 (80%)  | 95 (20%)  | 0.89 (0.68, 1.16)        |        | 0.88 (0.66, 1.17)        |        |
|                                                          | ≥2+             | 526 (20%)  | 421 (80%)  | 105 (20%) | 0.79 (0.61, 1.02)        |        | 0.87 (0.66, 1.15)        |        |
| Vitreous cells<br>at baseline                            | Quiet           | 1867 (76%) | 1442 (77%) | 425 (23%) | Ref                      | 0.12   | Ref                      | 0.17   |
|                                                          | 0.5+            | 210 (9%)   | 146 (70%)  | 64 (30%)  | 1.30 (0.97, 1.75)        |        | 1.14 (0.80, 1.63)        |        |
|                                                          | 1+              | 232 (9%)   | 184 (79%)  | 48 (21%)  | 0.87 (0.63, 1.20)        |        | 0.73 (0.52, 1.04)        |        |
|                                                          | ≥2+             | 143 (6%)   | 111 (78%)  | 32 (22%)  | 0.77 (0.50, 1.18)        |        | 0.75 (0.46, 1.21)        |        |
| Keratic precipitates                                     | No              | 2079 (83%) | 1580 (76%) | 499 (24%) | Ref                      | <0.001 | Ref                      | <0.001 |
|                                                          | Yes             | 430 (17%)  | 334 (78%)  | 96 (22%)  | 0.37 (0.22, 0.61)        |        | 0.36 (0.21, 0.60)        |        |
| Band Keratopathy                                         | No              | 2276 (91%) | 1709 (75%) | 567 (25%) | Ref                      | <0.001 | Ref                      | 0.14   |
|                                                          | Yes             | 231 (9%)   | 202 (87%)  | 29 (13%)  | 0.41 (0.29, 0.58)        |        | 0.75 (0.51, 1.10)        |        |

|                               |                                   | Remission  |            |           | Crude                    |        | Adjusted*                |        |
|-------------------------------|-----------------------------------|------------|------------|-----------|--------------------------|--------|--------------------------|--------|
|                               |                                   | Total      | No         | Yes       | Hazard Ratio<br>(95% CI) | p      | Hazard Ratio<br>(95% CI) | p      |
| Synechia                      | Neither                           | 1940 (72%) | 1459 (75%) | 481 (25%) | Ref                      | <0.001 | Ref                      | 0.008  |
|                               | Peripheral Synechia Only          | 61 (2%)    | 43 (70%)   | 18 (30%)  | 0.74 (0.42, 1.29)        |        | 0.69 (0.36, 1.32)        |        |
|                               | Posterior Synechia Only           | 604 (23%)  | 488 (81%)  | 116 (19%) | 0.67 (0.55, 0.83)        |        | 0.72 (0.58, 0.90)        |        |
|                               | Posterior and Peripheral Synechia | 79 (3%)    | 66 (84%)   | 13 (16%)  | 0.56 (0.38, 0.84)        |        | 0.62 (0.41, 0.93)        |        |
| Macular Edema                 | No                                | 1967 (89%) | 1512 (77%) | 455 (23%) | Ref                      | 0.63   | Ref                      | 0.50   |
|                               | Yes                               | 232 (11%)  | 166 (72%)  | 66 (28%)  | 0.91 (0.62, 1.33)        |        | 1.14 (0.78, 1.67)        |        |
| Sarcoidosis                   | No                                | 2548 (91%) | 1949 (76%) | 599 (24%) | Ref                      | 0.99   | Ref                      | 0.20   |
|                               | Yes                               | 247 (9%)   | 184 (74%)  | 63 (26%)  | 1.00 (0.72, 1.40)        |        | 0.79 (0.55, 1.13)        |        |
| Juvenile Idiopathic Arthritis | No                                | 2192 (78%) | 1602 (73%) | 590 (27%) | Ref                      | <0.001 | Ref                      | <0.001 |
|                               | Yes                               | 603 (22%)  | 531 (88%)  | 72 (12%)  | 0.34 (0.25, 0.47)        |        | 0.37 (0.26, 0.53)        |        |
| Spondyloarthropathy           | No                                | 2525 (90%) | 1899 (75%) | 626 (25%) | Ref                      | <0.001 | Ref                      | <0.001 |
|                               | Yes                               | 270 (10%)  | 234 (87%)  | 36 (13%)  | 0.41 (0.27, 0.62)        |        | 0.35 (0.23, 0.54)        |        |
| HLAB27                        | No                                | 2401 (86%) | 1843 (77%) | 558 (23%) | Ref                      | 0.37   | Ref                      | 0.10   |
|                               | Yes                               | 394 (14%)  | 290 (74%)  | 104 (26%) | 0.89 (0.69, 1.15)        |        | 1.27 (0.96, 1.68)        |        |
| Behçet Disease                | No                                | 2774 (99%) | 2118 (76%) | 656 (24%) | Ref                      | 0.36   | Ref                      | 0.12   |
|                               | Yes                               | 21 (1%)    | 15 (71%)   | 6 (29%)   | 0.72 (0.35, 1.47)        |        | 0.46 (0.17, 1.23)        |        |
| Systemic Lupus                | No                                | 2772 (99%) | 2111 (76%) | 661 (24%) | Ref                      | 0.06   | Ref                      | 0.055  |
|                               | Yes                               | 23 (1%)    | 22 (96%)   | 1 (4%)    | 0.16 (0.02, 1.04)        |        | 0.18 (0.03, 1.03)        |        |
| Diabetes                      | No                                | 2566 (92%) | 1973 (77%) | 593 (23%) | Ref                      | 0.007  | Ref                      | 0.37   |
|                               | Yes                               | 229 (8%)   | 160 (70%)  | 69 (30%)  | 1.56 (1.13, 2.16)        |        | 1.18 (0.82, 1.69)        |        |

|                            |     | Remission  |            |           | Crude                    |       | Adjusted*                |      |
|----------------------------|-----|------------|------------|-----------|--------------------------|-------|--------------------------|------|
|                            |     | Total      | No         | Yes       | Hazard Ratio<br>(95% CI) | p     | Hazard Ratio<br>(95% CI) | p    |
| Hypertension               | No  | 2085 (75%) | 1632 (78%) | 453 (22%) | Ref                      | 0.003 | Ref                      | 0.78 |
|                            | Yes | 710 (25%)  | 501 (71%)  | 209 (29%) | 1.38 (1.11, 1.70)        |       | 0.96 (0.74, 1.25)        |      |
| Hyperlipidemia             | No  | 2506 (90%) | 1931 (77%) | 575 (23%) | Ref                      | 0.007 | Ref                      | 0.42 |
|                            | Yes | 289 (10%)  | 202 (70%)  | 87 (30%)  | 1.46 (1.11, 1.92)        |       | 1.13 (0.84, 1.52)        |      |
| Statins ≥90 days           | No  | 2576 (92%) | 1972 (77%) | 604 (23%) | Ref                      | 0.003 | Ref                      | 0.40 |
|                            | Yes | 219 (8%)   | 161 (74%)  | 58 (26%)  | 1.68 (1.20, 2.35)        |       | 1.17 (0.81, 1.69)        |      |
| ACE Inhibitors<br>≥90 days | No  | 2628 (94%) | 2010 (76%) | 618 (24%) | Ref                      | 0.006 | Ref                      | 0.32 |
|                            | Yes | 167 (6%)   | 123 (74%)  | 44 (26%)  | 1.67 (1.16, 2.42)        |       | 1.24 (0.81, 1.87)        |      |
| Aspirin ≥90 days           | No  | 2660 (95%) | 2033 (76%) | 627 (24%) | Ref                      | 0.01  | Ref                      | 0.49 |
|                            | Yes | 135 (5%)   | 100 (74%)  | 35 (26%)  | 1.78 (1.14, 2.78)        |       | 1.18 (0.73, 1.90)        |      |

† Includes eyes of patients who did not return for follow-up after 90 days, but had 1 or more follow-up visits before 90 days and had remained inactive without receiving suppressive medications at all of those visits, as being in remission.

\* Adjusted for age at presentation, bilateral, duration of uveitis prior to presentation, prior cataract surgery, any glaucoma surgery, anterior chamber cells at baseline, keratic precipitates, synechia, juvenile idiopathic arthritis, spondyloarthropathy
