# Supplementary material
Source: PubMed Central journal article supplement (PMC7246152)
Supplement: NIHMS1545613-supplement-3.pdf [file NIHMS1545613-supplement-3.pdf]

Supplemental Table 2. All Factors Examined for Prediction of Remission of Chronic Anterior Uveitis (Hazard Ratios Less than 1 are Unfavorable, Indicating a Lower Incidence of Remission); Conservative Analysis.†

|                                                  |                                | Crude                    |        | Adjusted*                |       |
|--------------------------------------------------|--------------------------------|--------------------------|--------|--------------------------|-------|
|                                                  |                                | Hazard Ratio<br>(95% CI) | p      | Hazard Ratio<br>(95% CI) | p     |
| <b>Age at presentation</b>                       | <b>&lt;40</b>                  | Ref                      | <0.001 | Ref                      | 0.17  |
|                                                  | <b>40+</b>                     | 1.61 (1.26, 2.04)        |        | 1.22 (0.92, 1.63)        |       |
| <b>Sex</b>                                       | <b>Male</b>                    | Ref                      | 0.93   | Ref                      | 0.65  |
|                                                  | <b>Female</b>                  | 0.99 (0.77, 1.27)        |        | 1.06 (0.82, 1.38)        |       |
| <b>Race category</b>                             | <b>White</b>                   | Ref                      | 0.69   | Ref                      | 0.70  |
|                                                  | <b>Black</b>                   | 0.83 (0.59, 1.17)        |        | 0.81 (0.56, 1.16)        |       |
|                                                  | <b>Hispanic</b>                | 0.78 (0.40, 1.54)        |        | 1.03 (0.52, 2.05)        |       |
|                                                  | <b>Other</b>                   | 0.95 (0.69, 1.33)        |        | 0.93 (0.66, 1.32)        |       |
| <b>Smoking</b>                                   | <b>Never</b>                   | Ref                      | 0.93   | Ref                      | 0.18  |
|                                                  | <b>Past</b>                    | 1.04 (0.71, 1.53)        |        | 0.85 (0.56, 1.30)        |       |
|                                                  | <b>Current</b>                 | 0.92 (0.63, 1.35)        |        | 0.69 (0.45, 1.06)        |       |
|                                                  | <b>Unknown</b>                 | 0.88 (0.52, 1.48)        |        | 0.61 (0.32, 1.14)        |       |
| <b>Bilateral</b>                                 | <b>No</b>                      | Ref                      | 0.41   | Ref                      | 0.48  |
|                                                  | <b>Yes</b>                     | 0.88 (0.65, 1.19)        |        | 0.90 (0.66, 1.22)        |       |
| <b>Duration of uveitis prior to presentation</b> | <b>&lt;6 Months</b>            | Ref                      | <0.001 | Ref                      | 0.009 |
|                                                  | <b>6 Months to &lt;2 Years</b> | 0.83 (0.61, 1.13)        |        | 0.79 (0.57, 1.09)        |       |
|                                                  | <b>2 to &lt;5 Years</b>        | 0.52 (0.36, 0.75)        |        | 0.56 (0.38, 0.81)        |       |
|                                                  | <b>5+ Years</b>                | 0.56 (0.41, 0.77)        |        | 0.65 (0.46, 0.91)        |       |
| <b>Prior cataract surgery</b>                    | <b>No</b>                      | Ref                      | 0.15   | Ref                      | 0.08  |
|                                                  | <b>Yes</b>                     | 0.84 (0.65, 1.07)        |        | 0.79 (0.60, 1.03)        |       |
| <b>Pars Plana Vitrectomy (not Ret Detach)</b>    | <b>No</b>                      | Ref                      | 0.055  | Ref                      | 0.52  |
|                                                  | <b>Yes</b>                     | 0.61 (0.36, 1.01)        |        | 0.84 (0.50, 1.42)        |       |
| <b>Any glaucoma surgery</b>                      | <b>No</b>                      | Ref                      | 0.053  | Ref                      | 0.08  |
|                                                  | <b>Yes</b>                     | 0.70 (0.49, 1.00)        |        | 0.70 (0.47, 1.05)        |       |
| <b>Inflammatory activity at baseline</b>         | <b>Inactive</b>                | Ref                      | 0.16   | Ref                      | 0.96  |
|                                                  | <b>Slightly active</b>         | 1.14 (0.81, 1.60)        |        | 1.03 (0.67, 1.60)        |       |
|                                                  | <b>Active</b>                  | 0.84 (0.65, 1.08)        |        | 1.06 (0.72, 1.58)        |       |

|                                    |                                   | Crude                    |        | Adjusted*                |        |
|------------------------------------|-----------------------------------|--------------------------|--------|--------------------------|--------|
|                                    |                                   | Hazard Ratio<br>(95% CI) | p      | Hazard Ratio<br>(95% CI) | p      |
| Anterior chamber cells at baseline | Quiet                             | Ref                      | 0.009  | Ref                      | 0.01   |
|                                    | 0.5+                              | 1.28 (0.97, 1.70)        |        | 1.34 (1.00, 1.79)        |        |
|                                    | 1+                                | 0.81 (0.58, 1.12)        |        | 0.81 (0.58, 1.14)        |        |
|                                    | ≥2+                               | 0.74 (0.54, 1.02)        |        | 0.83 (0.59, 1.17)        |        |
| Vitreous cells at baseline         | Quiet                             | Ref                      | 0.33   | Ref                      | 0.40   |
|                                    | 0.5+                              | 1.18 (0.80, 1.74)        |        | 1.08 (0.69, 1.69)        |        |
|                                    | 1+                                | 0.76 (0.50, 1.16)        |        | 0.72 (0.46, 1.13)        |        |
|                                    | ≥2+                               | 0.78 (0.47, 1.32)        |        | 0.74 (0.40, 1.35)        |        |
| Keratic precipitates               | No                                | Ref                      | <0.001 | Ref                      | <0.001 |
|                                    | Yes                               | 0.27 (0.14, 0.53)        |        | 0.27 (0.14, 0.53)        |        |
| Band Keratopathy                   | No                                | Ref                      | <0.001 | Ref                      | 0.17   |
|                                    | Yes                               | 0.42 (0.28, 0.62)        |        | 0.74 (0.48, 1.14)        |        |
| Synechia                           | Neither                           | Ref                      | <0.001 | Ref                      | 0.003  |
|                                    | Peripheral Synechia Only          | 0.76 (0.39, 1.46)        |        | 0.71 (0.34, 1.50)        |        |
|                                    | Posterior Synechia Only           | 0.56 (0.43, 0.74)        |        | 0.62 (0.46, 0.82)        |        |
|                                    | Posterior and Peripheral Synechia | 0.49 (0.29, 0.81)        |        | 0.54 (0.32, 0.91)        |        |
| Macular Edema                      | No                                | Ref                      | 0.40   | Ref                      | 0.62   |
|                                    | Yes                               | 0.81 (0.51, 1.31)        |        | 1.13 (0.70, 1.83)        |        |
| Sarcoidosis                        | No                                | Ref                      | 0.74   | Ref                      | 0.51   |
|                                    | Yes                               | 1.07 (0.72, 1.60)        |        | 0.87 (0.56, 1.33)        |        |
| Juvenile Idiopathic Arthritis      | No                                | Ref                      | <0.001 | Ref                      | <0.001 |
|                                    | Yes                               | 0.40 (0.28, 0.57)        |        | 0.42 (0.28, 0.64)        |        |
| Spondyloarthropathy                | No                                | Ref                      | 0.002  | Ref                      | <0.001 |
|                                    | Yes                               | 0.48 (0.30, 0.77)        |        | 0.42 (0.26, 0.69)        |        |
| HLAB27                             | No                                | Ref                      | 0.23   | Ref                      | 0.58   |
|                                    | Yes                               | 0.82 (0.59, 1.13)        |        | 1.11 (0.77, 1.60)        |        |
| Behçet Disease                     | No                                | Ref                      | 0.85   | Ref                      | 0.36   |
|                                    | Yes                               | 1.07 (0.51, 2.24)        |        | 0.63 (0.23, 1.70)        |        |

|                                    |            | Crude                    |        | Adjusted*                |      |
|------------------------------------|------------|--------------------------|--------|--------------------------|------|
|                                    |            | Hazard Ratio<br>(95% CI) | p      | Hazard Ratio<br>(95% CI) | p    |
| <b>Systemic Lupus</b>              | <b>No</b>  | Ref                      | 0.13   | Ref                      | 0.17 |
|                                    | <b>Yes</b> | 0.24 (0.04, 1.55)        |        | 0.29 (0.05, 1.69)        |      |
| <b>Diabetes</b>                    | <b>No</b>  | Ref                      | 0.01   | Ref                      | 0.40 |
|                                    | <b>Yes</b> | 1.65 (1.12, 2.44)        |        | 1.21 (0.78, 1.87)        |      |
| <b>Hypertension</b>                | <b>No</b>  | Ref                      | <0.001 | Ref                      | 0.29 |
|                                    | <b>Yes</b> | 1.55 (1.20, 1.99)        |        | 1.19 (0.86, 1.65)        |      |
| <b>Hyperlipidemia</b>              | <b>No</b>  | Ref                      | <0.001 | Ref                      | 0.04 |
|                                    | <b>Yes</b> | 1.82 (1.34, 2.47)        |        | 1.44 (1.02, 2.03)        |      |
| <b>Statins ≥90 days</b>            | <b>No</b>  | Ref                      | 0.006  | Ref                      | 0.37 |
|                                    | <b>Yes</b> | 1.76 (1.18, 2.64)        |        | 1.23 (0.78, 1.92)        |      |
| <b>ACE Inhibitors<br/>≥90 days</b> | <b>No</b>  | Ref                      | 0.01   | Ref                      | 0.31 |
|                                    | <b>Yes</b> | 1.73 (1.12, 2.68)        |        | 1.29 (0.79, 2.10)        |      |
| <b>Aspirin ≥90 days</b>            | <b>No</b>  | Ref                      | 0.01   | Ref                      | 0.38 |
|                                    | <b>Yes</b> | 1.95 (1.17, 3.26)        |        | 1.27 (0.74, 2.19)        |      |

† To be considered in remission in the conservative analysis, eyes had to be completely inactive while not taking any medications at visits spanning 90 days or more; eyes quiet at the last visit who were not observed again over a period of at least 90 days were censored.

\* Adjusted for age at presentation, bilateral, duration of uveitis prior to presentation, prior cataract surgery, any glaucoma surgery, anterior chamber cells at baseline, keratic precipitates, synechia, juvenile idiopathic arthritis, spondyloarthritis
