# Supplementary material
Source: PubMed Central journal article supplement (PMC7246152)

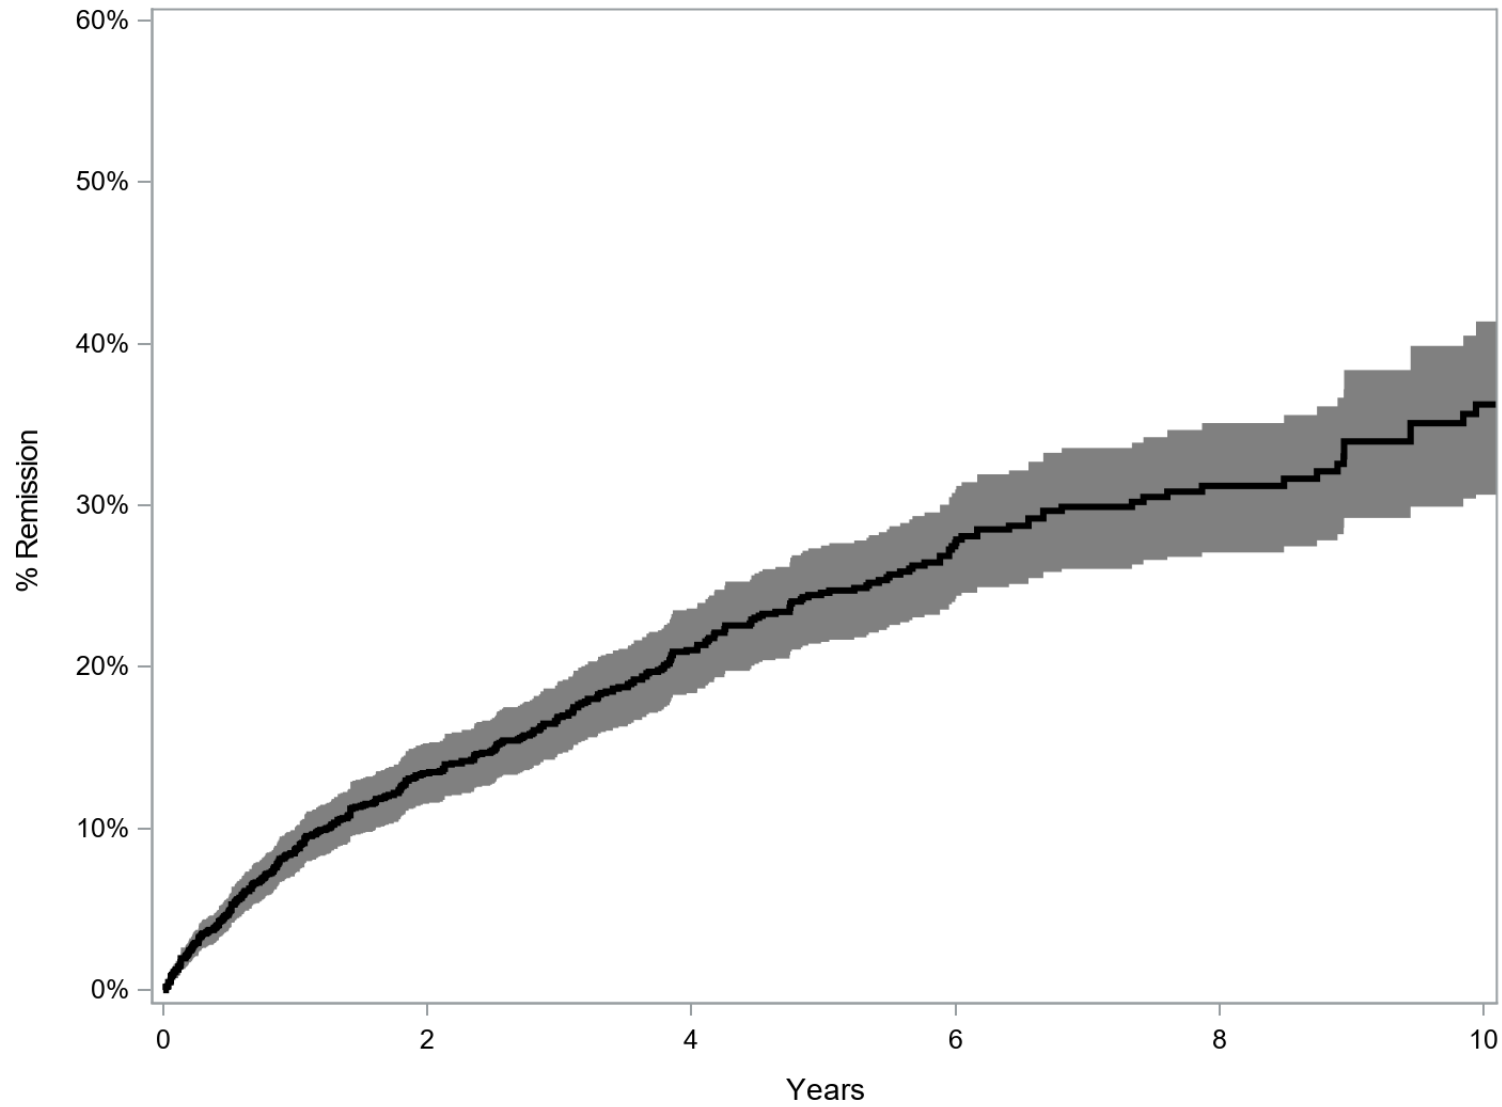

Supplement: NIHMS1545613-supplement-1.pdf [file NIHMS1545613-supplement-1.pdf]
